# Supplementary material for: Small mobile sequences in bacteria display diverse structure/function motifs
Source: PubMed Central journal article supplement (PMC2229807; doi:10.1111/j.1365-2958.2007.06068.x), 2007-12-12
Supplement: mmi0067-0475-SD1.pdf [file mmi0067-0475-SD1.pdf]

## Small mobile sequences in bacteria display diverse structure/function motifs

### Supplement

Nicholas Delihias, Department of Molecular Genetics and Microbiology, School of Medicine, SUNY, Stony Brook, NY 11794-5222 USA

#### ***Neisseria meningitidis* Correia/NEMIS repeat element**

A 107 bp repeat element is found in *Neisseria* sp. in both intergenic and intragenic regions of chromosomes. The nucleotide sequence of the element, located at positions 933983-933877 in the *N. meningitidis* FAM18 genomic sequence is:

5'TATAGTGGATTAAATTTAAACCAGTACAGCGTTGCCTCGCCTTGCCGTACT  
ATTTGTA CTGTCTGCGGCTTCGTCGCCTTGTCCTGATTTAAATTTAATCCACT  
ATA3'

This sequence displays a contiguous open reading frame in the frame +1 and a partial open reading frame in the frame -1:

<sub>1</sub>Y SGLN LNQDKATKPQTVQIVRQGEATLYWFKFNPL<sub>-35</sub>

<sub>1</sub>Y SGLN LNQYSVASPCRTICTVCGFVALS<sub>28</sub>

The 107 bp sequence is found fused to gene loci that encode transposase and other annotated gene loci. Table S1 shows sixteen gene loci where the 107 bp sequence open reading frames (predominantly the frame-1) are fused to other open reading frames. These loci were identified with the NCBI Blast program using a protein blastx search (web site <http://www.ncbi.nlm.nih.gov/BLAST/>). E - values are as shown by the blast program. The loci shown in Table S1 are from

the following species: *N. meningitidis* MC58, *N. meningitidis* Z2491, *N. meningitidis* FAM18 and *N. gonorrhoeae* FA 1090.

Table S2 displays transposase gene loci from three different families of transposases that contain the 107 bp repeat element. Positions of repeat sequence within transposase sequences are also shown. Only the frame +1 amino acid sequence is found fused to the transposase open reading frames.

A comparison of sequences from transposase gene loci *NMB0991* and *NMB1539* in *N. meningitidis* MC58, as well as the sequence from the orthologous transposase locus *NMA0458* from *N. meningitidis* Z2491 is in Fig. S1. The alignment shows the 107 bp insert sequence is in *NMB0991* and *NMA0458* but not in *NMB1539*. The sequence alignment suggests that during fusion, a <sup>5'</sup>TA<sup>3'</sup> dinucleotide was duplicated and there was no replacement of sequences in the target site but an addition of the mobile sequence. The alignment also suggests that the mobile sequence is 105-bp.

**Table S1**  
**Gene loci containing *N. meningitidis* 107 bp insert**

| Locus                | Proposed protein                   | aa chain length | insertion site | %identity | Score | Expect value |
|----------------------|------------------------------------|-----------------|----------------|-----------|-------|--------------|
| NMB1858              | hypothetical protein               | 128 aa          | (3-32)         | 100%      | 65.9  | 1e-12        |
| NMC0306 <sup>a</sup> | putative integral membrane protein | 135 aa          | (108-135)      | 96%       | 60.8  | 3e-11        |
| NMB1917 <sup>a</sup> | hypothetical protein               | 135 aa          | (108-135)      | 96%       | 60.8  | 3e-11        |
| NMB2149              | hypothetical protein               | 86 aa           | (59-86)        | 96%       | 89.3  | 3e-11        |
| NMB0676 <sup>b</sup> | hypothetical protein               | 133 aa          | (106-133)      | 96%       | 60.8  | 3e-11        |
| NMA0876 <sup>b</sup> | hypothetical protein               | 133 aa          | (106-133)      | 96%       | 60.8  | 3e-11        |
| NGO1359              | hypothetical protein               | 83 aa           | (18-40)        | 91%       | 49.3  | 2e-10        |
| NGO0015              | hypothetical protein               | 94 aa           | (46-68)        | 86%       | 47.8  | 3e-10        |
| NMB1695              | hypothetical protein               | 326 aa          | (299-326)      | 86%       | 37.4  | 4e-04        |
| NGO1034              | hypothetical protein               | 114 aa          | (25-52)        | 88%       | 36.6  | 6e-04        |
| NMB1837              | hypothetical protein               | 84 aa           | (64-84)        | 94%       | 36.2  | 8e-04        |
| NGO1604              | hypothetical protein               | 80aa            | (18-35)        | 72%       | 33.5  | 0.005        |
| NGO1255              | hypothetical protein               | 113 aa          | (96-113)       | 94%       | 32.7  | 0.009        |
| NMA0537 <sup>a</sup> | predicted membrane protein         | 121 aa          | (108-121)      | 92%       | 30.8  | 0.035        |
| NMA1071              | hypothetical protein               | 139 aa          | (126-139)      | 92%       | 30.8  | 0.035        |
| NMB1915              | hypothetical protein               | 129aa           | (79-89)        | 100%      | 23.9  | 3.7          |

<sup>a</sup> loci are orthologs; <sup>b</sup> loci are orthologs

**Table S2**

***Neisseria meningitidis* transposase genes with 107 bp insert sequence**

| <b>Transposase locus</b>                                    | <b>aa chain length</b> | <b>aa positions of insert</b> |
|-------------------------------------------------------------|------------------------|-------------------------------|
| <b>NMB0991 IS1106 transposase_11 IS5 family</b>             | <b>370 aa</b>          | <b>283-317</b>                |
| <b>NMA0458 IS1106 transposase_11 IS5 family</b>             | <b>370 aa</b>          | <b>283-317</b>                |
| <b>NMA1641<sup>a</sup> IS1106 transposase_11 IS5 family</b> | <b>273 aa</b>          | <b>186-220</b>                |
| <b>NMC1340<sup>b</sup> IS1106 transposase_11 IS5 family</b> | <b>166 aa</b>          | <b>79-113</b>                 |
| <b>NMB1386 has transposase_14 IS630 family</b>              | <b>151 aa</b>          | <b>14-48</b>                  |
| <b>NMC1006 has Tra5/integrase core domain</b>               | <b>249 aa</b>          | <b>189-223</b>                |

<sup>a</sup>missing first 97 aa at N-terminal

<sup>b</sup>missing first 204aa at N-terminal

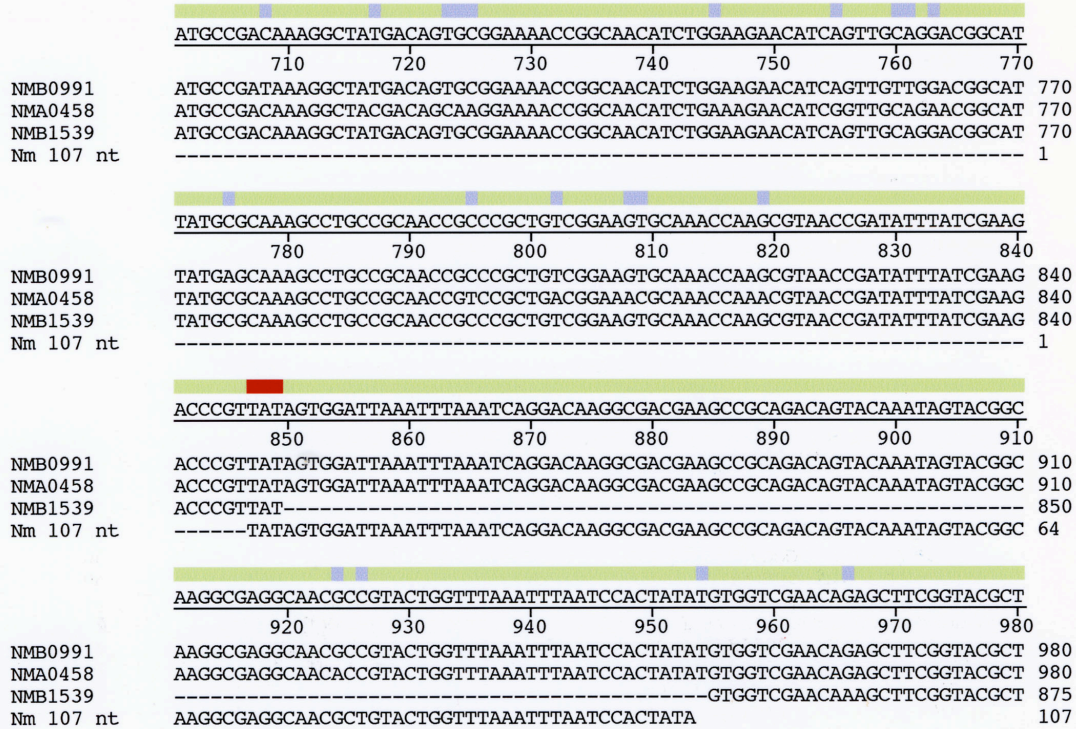

Fig. S1. Alignment of nucleotide sequences from the 5' ends of transposase gene loci *NMB0991* and *NMB1539* from *N. meningitidis* *MC58*, the orthologous transposase locus *NMA0458* from *N. meningitidis* *Z2491*, and the 107 nt MITE unit sequence from *N. meningitidis* *FAM18*. Alignment was by the DNASTAR, Inc program using the ClustalW alignment program. Note that the alignment of T at position 849 of *NMB1539*, as produced by the alignment program, is arbitrary. However alignment of this T at position 954 is more consistent, as it shows no gap with the Nm 107 nt sequence.
